# Supplementary material
Source: MDPI journal article supplement (https://www.mdpi.com/2075-163X/1/1/144)
Supplement: s1 [file s1]

## Sheet: appendix
Radius of reduction of emissions (km)
Alumina refining (relocating to countries with gas from bauxite producing countries using coal for thermal energy)
To:	Mozambique	Iceland	Norway	Tajikistan	Sweden	France	Brazil	Canada	Venezuela	New Zealand	Ghana	Slovakia	Cameroon	United States	Russia	Spain	Slovenia	Hungary	Argentina	Ukraine	Netherlands	Italy	Nigeria	Azerbaijan	Romania	Japan	Kazakhstan	Germany	Pakistan	Egypt	Ireland	United Kingdom	Turkey	Guinea	Guyana	Tanzania	Montenegro	Iran	Suriname	Dominican Republic	Bahrain	Poland	Malaysia	Sierra Leone	Indonesia	Greece	China	Jamaica	South Africa
Electricity grid emissions (kg CO2-eq / GJ)	0.110667	0.208056	1.455	8.50719	11.0942	22.9769	24.6817	50.1611	56.2648	59.3097	59.5377	60.3206	63.9594	67.264	90.4201	90.5217	91.3423	91.9006	101.666	107.254	108.911	110.684	112.057	115.684	115.735	121.237	121.911	122.55	125.311	127.712	135.057	135.264	137.577	143.261	143.261	143.261	149.796	161.572	169.191	174.017	180.761	181.511	182.199	186.354	201.705	203.116	206.931	217.963	231.93
From:
Mozambique	0	0	7585.78	0	0	0	7397.76	7191.5	7142.09	0	0	0	0	7053.04	6865.59	0	0	0	6774.55	6729.32	6715.9	6701.55	6690.44	6661.07	6660.66	0	6610.66	6605.49	6583.14	6563.7	0	6502.57	0	0	0	0	0	6289.59	0	0	6134.26	6128.19	6122.62	0	5964.71	0	5922.41	0	0
Iceland	0	0	0	0	0	0	0	0	0	0	0	0	0	0	0	0	0	0	0	0	0	0	0	0	0	0	0	0	0	0	0	0	0	0	0	0	0	0	0	0	0	0	0	0	0	0	0	0	0
Norway	0	0	0	0	0	0	0	0	0	0	0	0	0	0	0	0	0	0	0	0	0	0	0	0	0	0	0	0	0	0	0	0	0	0	0	0	0	0	0	0	0	0	0	0	0	0	0	0	0
Tajikistan	0	0	0	0	0	0	0	0	0	0	0	0	0	0	0	0	0	0	0	0	0	0	0	0	0	0	0	0	0	0	0	0	0	0	0	0	0	0	0	0	0	0	0	0	0	0	0	0	0
Sweden	0	0	0	0	0	0	0	0	0	0	0	0	0	0	0	0	0	0	0	0	0	0	0	0	0	0	0	0	0	0	0	0	0	0	0	0	0	0	0	0	0	0	0	0	0	0	0	0	0
France	0	0	0	0	0	0	0	0	0	0	0	0	0	0	0	0	0	0	0	0	0	0	0	0	0	0	0	0	0	0	0	0	0	0	0	0	0	0	0	0	0	0	0	0	0	0	0	0	0
Brazil	0	0	7784.69	0	0	0	7596.67	7390.4	7340.99	0	0	0	0	7251.95	7064.5	0	0	0	6973.46	6928.22	6914.81	6900.45	6889.34	6859.98	6859.57	0	6809.57	6804.4	6782.05	6762.61	0	6701.48	0	0	0	0	0	6488.5	0	0	6333.16	6327.09	6321.53	0	6163.62	0	6121.32	0	0
Canada	0	0	0	0	0	0	0	0	0	0	0	0	0	0	0	0	0	0	0	0	0	0	0	0	0	0	0	0	0	0	0	0	0	0	0	0	0	0	0	0	0	0	0	0	0	0	0	0	0
Venezuela	0	0	8040.37	0	0	0	7852.34	7646.08	7596.67	0	0	0	0	7507.63	7320.17	0	0	0	7229.13	7183.9	7170.48	7156.13	7145.02	7115.65	7115.24	0	7065.25	7060.07	7037.72	7018.28	0	6957.15	0	0	0	0	0	6744.18	0	0	6588.84	6582.77	6577.2	0	6419.29	0	6376.99	0	0
New Zealand	0	0	0	0	0	0	0	0	0	0	0	0	0	0	0	0	0	0	0	0	0	0	0	0	0	0	0	0	0	0	0	0	0	0	0	0	0	0	0	0	0	0	0	0	0	0	0	0	0
Ghana	0	0	8066.86	0	0	0	7878.83	7672.57	7623.16	0	0	0	0	7534.12	7346.67	0	0	0	7255.62	7210.39	7196.98	7182.62	7171.51	7142.15	7141.74	0	7091.74	7086.56	7064.22	7044.78	0	6983.65	0	0	0	0	0	6770.67	0	0	6615.33	6609.26	6603.69	0	6445.79	0	6403.49	0	0
Slovakia	0	0	0	0	0	0	0	0	0	0	0	0	0	0	0	0	0	0	0	0	0	0	0	0	0	0	0	0	0	0	0	0	0	0	0	0	0	0	0	0	0	0	0	0	0	0	0	0	0
Cameroon	0	0	0	0	0	0	0	0	0	0	0	0	0	0	0	0	0	0	0	0	0	0	0	0	0	0	0	0	0	0	0	0	0	0	0	0	0	0	0	0	0	0	0	0	0	0	0	0	0
United States	0	0	0	0	0	0	0	0	0	0	0	0	0	0	0	0	0	0	0	0	0	0	0	0	0	0	0	0	0	0	0	0	0	0	0	0	0	0	0	0	0	0	0	0	0	0	0	0	0
Russia	0	0	8316.86	0	0	0	8128.84	7922.57	7873.16	0	0	0	0	7784.12	7596.67	0	0	0	7505.62	7460.39	7446.98	7432.62	7421.51	7392.15	7391.74	0	7341.74	7336.57	7314.22	7294.78	0	7233.65	0	0	0	0	0	7020.67	0	0	6865.33	6859.26	6853.69	0	6695.79	0	6653.49	0	0
Spain	0	0	0	0	0	0	0	0	0	0	0	0	0	0	0	0	0	0	0	0	0	0	0	0	0	0	0	0	0	0	0	0	0	0	0	0	0	0	0	0	0	0	0	0	0	0	0	0	0
Slovenia	0	0	0	0	0	0	0	0	0	0	0	0	0	0	0	0	0	0	0	0	0	0	0	0	0	0	0	0	0	0	0	0	0	0	0	0	0	0	0	0	0	0	0	0	0	0	0	0	0
Hungary	0	0	8328.84	0	0	0	8140.82	7934.56	7885.15	0	0	0	0	7796.11	7608.65	0	0	0	7517.61	7472.38	7458.96	7444.61	7433.5	7404.13	7403.72	0	7353.73	7348.55	7326.2	7306.76	0	7245.63	0	0	0	0	0	7032.66	0	0	6877.32	6871.25	6865.68	0	6707.77	0	6665.47	0	0
Argentina	0	0	0	0	0	0	0	0	0	0	0	0	0	0	0	0	0	0	0	0	0	0	0	0	0	0	0	0	0	0	0	0	0	0	0	0	0	0	0	0	0	0	0	0	0	0	0	0	0
Ukraine	0	0	0	0	0	0	0	0	0	0	0	0	0	0	0	0	0	0	0	0	0	0	0	0	0	0	0	0	0	0	0	0	0	0	0	0	0	0	0	0	0	0	0	0	0	0	0	0	0
Netherlands	0	0	0	0	0	0	0	0	0	0	0	0	0	0	0	0	0	0	0	0	0	0	0	0	0	0	0	0	0	0	0	0	0	0	0	0	0	0	0	0	0	0	0	0	0	0	0	0	0
Italy	0	0	0	0	0	0	0	0	0	0	0	0	0	0	0	0	0	0	0	0	0	0	0	0	0	0	0	0	0	0	0	0	0	0	0	0	0	0	0	0	0	0	0	0	0	0	0	0	0
Nigeria	0	0	0	0	0	0	0	0	0	0	0	0	0	0	0	0	0	0	0	0	0	0	0	0	0	0	0	0	0	0	0	0	0	0	0	0	0	0	0	0	0	0	0	0	0	0	0	0	0
Azerbaijan	0	0	0	0	0	0	0	0	0	0	0	0	0	0	0	0	0	0	0	0	0	0	0	0	0	0	0	0	0	0	0	0	0	0	0	0	0	0	0	0	0	0	0	0	0	0	0	0	0
Romania	0	0	0	0	0	0	0	0	0	0	0	0	0	0	0	0	0	0	0	0	0	0	0	0	0	0	0	0	0	0	0	0	0	0	0	0	0	0	0	0	0	0	0	0	0	0	0	0	0
Japan	0	0	0	0	0	0	0	0	0	0	0	0	0	0	0	0	0	0	0	0	0	0	0	0	0	0	0	0	0	0	0	0	0	0	0	0	0	0	0	0	0	0	0	0	0	0	0	0	0
Kazakhstan	0	0	8571.79	0	0	0	8383.76	8177.5	8128.09	0	0	0	0	8039.05	7851.59	0	0	0	7760.55	7715.32	7701.91	7687.55	7676.44	7647.07	7646.66	0	7596.67	7591.49	7569.14	7549.7	0	7488.57	0	0	0	0	0	7275.6	0	0	7120.26	7114.19	7108.62	0	6950.71	0	6908.41	0	0
Germany	0	0	0	0	0	0	0	0	0	0	0	0	0	0	0	0	0	0	0	0	0	0	0	0	0	0	0	0	0	0	0	0	0	0	0	0	0	0	0	0	0	0	0	0	0	0	0	0	0
Pakistan	0	0	8599.31	0	0	0	8411.28	8205.02	8155.61	0	0	0	0	8066.57	7879.12	0	0	0	7788.07	7742.84	7729.43	7715.07	7703.96	7674.6	7674.19	0	7624.19	7619.01	7596.67	7577.23	0	7516.1	0	0	0	0	0	7303.12	0	0	7147.78	7141.71	7136.14	0	6978.24	0	6935.94	0	0
Egypt	0	0	0	0	0	0	0	0	0	0	0	0	0	0	0	0	0	0	0	0	0	0	0	0	0	0	0	0	0	0	0	0	0	0	0	0	0	0	0	0	0	0	0	0	0	0	0	0	0
Ireland	0	0	0	0	0	0	0	0	0	0	0	0	0	0	0	0	0	0	0	0	0	0	0	0	0	0	0	0	0	0	0	0	0	0	0	0	0	0	0	0	0	0	0	0	0	0	0	0	0
United Kingdom	0	0	0	0	0	0	0	0	0	0	0	0	0	0	0	0	0	0	0	0	0	0	0	0	0	0	0	0	0	0	0	0	0	0	0	0	0	0	0	0	0	0	0	0	0	0	0	0	0
Turkey	0	0	8698.61	0	0	0	8510.59	8304.32	8254.91	0	0	0	0	8165.87	7978.42	0	0	0	7887.37	7842.14	7828.73	7814.37	7803.26	7773.9	7773.49	0	7723.49	7718.32	7695.97	7676.53	0	7615.4	0	0	0	0	0	7402.42	0	0	7247.08	7241.01	7235.44	0	7077.54	0	7035.24	0	0
Guinea	0	0	8744.62	0	0	0	8556.59	8350.33	8300.92	0	0	0	0	8211.88	8024.43	0	0	0	7933.38	7888.15	7874.74	7860.38	7849.27	7819.91	7819.5	0	7769.5	7764.33	7741.98	7722.54	0	7661.41	0	0	0	0	0	7448.43	0	0	7293.09	7287.02	7281.45	0	7123.55	0	7081.25	0	0
Guyana	0	0	8744.62	0	0	0	8556.59	8350.33	8300.92	0	0	0	0	8211.88	8024.43	0	0	0	7933.38	7888.15	7874.74	7860.38	7849.27	7819.91	7819.5	0	7769.5	7764.33	7741.98	7722.54	0	7661.41	0	0	0	0	0	7448.43	0	0	7293.09	7287.02	7281.45	0	7123.55	0	7081.25	0	0
Tanzania	0	0	8744.62	0	0	0	8556.59	8350.33	8300.92	0	0	0	0	8211.88	8024.43	0	0	0	7933.38	7888.15	7874.74	7860.38	7849.27	7819.91	7819.5	0	7769.5	7764.33	7741.98	7722.54	0	7661.41	0	0	0	0	0	7448.43	0	0	7293.09	7287.02	7281.45	0	7123.55	0	7081.25	0	0
Montenegro	0	0	8797.53	0	0	0	8609.5	8403.24	8353.83	0	0	0	0	8264.79	8077.33	0	0	0	7986.29	7941.06	7927.65	7913.29	7902.18	7872.81	7872.4	0	7822.41	7817.23	7794.88	7775.44	0	7714.31	0	0	0	0	0	7501.34	0	0	7346	7339.93	7334.36	0	7176.45	0	7134.15	0	0
Iran	0	0	8892.86	0	0	0	8704.83	8498.57	8449.16	0	0	0	0	8360.12	8172.66	0	0	0	8081.62	8036.39	8022.98	8008.62	7997.51	7968.14	7967.73	0	7917.74	7912.56	7890.21	7870.77	0	7809.64	0	0	0	0	0	7596.67	0	0	7441.33	7435.26	7429.69	0	7271.78	0	7229.48	0	0
Suriname	0	0	8954.53	0	0	0	8766.5	8560.24	8510.83	0	0	0	0	8421.79	8234.33	0	0	0	8143.29	8098.06	8084.65	8070.29	8059.18	8029.81	8029.4	0	7979.41	7974.23	7951.88	7932.44	0	7871.31	0	0	0	0	0	7658.34	0	0	7503	7496.93	7491.36	0	7333.45	0	7291.15	0	0
Dominican Republic	0	0	8993.6	0	0	0	8805.57	8599.31	8549.9	0	0	0	0	8460.86	8273.4	0	0	0	8182.36	8137.13	8123.72	8109.36	8098.25	8068.88	8068.47	0	8018.48	8013.3	7990.95	7971.52	0	7910.38	0	0	0	0	0	7697.41	0	0	7542.07	7536	7530.43	0	7372.53	0	7330.22	0	0
Bahrain	0	0	0	0	0	0	0	0	0	0	0	0	0	0	0	0	0	0	0	0	0	0	0	0	0	0	0	0	0	0	0	0	0	0	0	0	0	0	0	0	0	0	0	0	0	0	0	0	0
Poland	0	0	0	0	0	0	0	0	0	0	0	0	0	0	0	0	0	0	0	0	0	0	0	0	0	0	0	0	0	0	0	0	0	0	0	0	0	0	0	0	0	0	0	0	0	0	0	0	0
Malaysia	0	0	9059.83	0	0	0	8871.81	8665.55	8616.13	0	0	0	0	8527.09	8339.64	0	0	0	8248.6	8203.36	8189.95	8175.6	8164.49	8135.12	8134.71	0	8084.71	8079.54	8057.19	8037.75	0	7976.62	0	0	0	0	0	7763.64	0	0	7608.31	7602.24	7596.67	0	7438.76	0	7396.46	0	0
Sierra Leone	0	0	9093.47	0	0	0	8905.44	8699.18	8649.77	0	0	0	0	8560.73	8373.27	0	0	0	8282.23	8237	8223.59	8209.23	8198.12	8168.75	8168.35	0	8118.35	8113.17	8090.83	8071.39	0	8010.26	0	0	0	0	0	7797.28	0	0	7641.94	7635.87	7630.3	0	7472.4	0	7430.09	0	0
Indonesia	0	0	9217.74	0	0	0	9029.71	8823.45	8774.04	0	0	0	0	8685	8497.54	0	0	0	8406.5	8361.27	8347.86	8333.5	8322.39	8293.02	8292.62	0	8242.62	8237.44	8215.09	8195.66	0	8134.53	0	0	0	0	0	7921.55	0	0	7766.21	7760.14	7754.57	0	7596.67	0	7554.36	0	0
Greece	0	0	9229.16	0	0	0	9041.14	8834.87	8785.46	0	0	0	0	8696.42	8508.97	0	0	0	8417.93	8372.69	8359.28	8344.92	8333.81	8304.45	8304.04	0	8254.04	8248.87	8226.52	8207.08	0	8145.95	0	0	0	0	0	7932.97	0	0	7777.63	7771.56	7765.99	0	7608.09	0	7565.79	0	0
China	0	0	9260.04	0	0	0	9072.02	8865.75	8816.34	0	0	0	0	8727.3	8539.85	0	0	0	8448.81	8403.57	8390.16	8375.8	8364.69	8335.33	8334.92	0	8284.92	8279.75	8257.4	8237.96	0	8176.83	0	0	0	0	0	7963.85	0	0	7808.51	7802.44	7796.87	0	7638.97	0	7596.67	0	0
Jamaica	0	0	9349.35	0	0	0	9161.33	8955.07	8905.65	0	0	0	0	8816.61	8629.16	0	0	0	8538.12	8492.89	8479.47	8465.12	8454.01	8424.64	8424.23	0	8374.23	8369.06	8346.71	8327.27	0	8266.14	0	0	0	0	0	8053.16	0	0	7897.83	7891.76	7886.19	0	7728.28	0	7685.98	0	0
South Africa	0	0	0	0	0	0	0	0	0	0	0	0	0	0	0	0	0	0	0	0	0	0	0	0	0	0	0	0	0	0	0	0	0	0	0	0	0	0	0	0	0	0	0	0	0	0	0	0	0
United Arab Emirates	0	0	0	0	0	0	0	0	0	0	0	0	0	0	0	0	0	0	0	0	0	0	0	0	0	0	0	0	0	0	0	0	0	0	0	0	0	0	0	0	0	0	0	0	0	0	0	0	0
Oman	0	0	0	0	0	0	0	0	0	0	0	0	0	0	0	0	0	0	0	0	0	0	0	0	0	0	0	0	0	0	0	0	0	0	0	0	0	0	0	0	0	0	0	0	0	0	0	0	0
Australia	0	0	9571.16	0	0	0	9383.13	9176.87	9127.46	0	0	0	0	9038.42	8850.96	0	0	0	8759.92	8714.69	8701.28	8686.92	8675.81	8646.44	8646.04	0	8596.04	8590.86	8568.51	8549.08	0	8487.95	0	0	0	0	0	8274.97	0	0	8119.63	8113.56	8107.99	0	7950.09	0	7907.78	0	0
Bosnia and Herzegovina	0	0	9672.32	0	0	0	9484.29	9278.03	9228.62	0	0	0	0	9139.58	8952.12	0	0	0	8861.08	8815.85	8802.44	8788.08	8776.97	8747.6	8747.2	0	8697.2	8692.02	8669.67	8650.24	0	8589.11	0	0	0	0	0	8376.13	0	0	8220.79	8214.72	8209.15	0	8051.25	0	8008.94	0	0
India	0	0	9762.12	0	0	0	9574.09	9367.83	9318.42	0	0	0	0	9229.38	9041.92	0	0	0	8950.88	8905.65	8892.24	8877.88	8866.77	8837.4	8836.99	0	8787	8781.82	8759.47	8740.04	0	8678.9	0	0	0	0	0	8465.93	0	0	8310.59	8304.52	8298.95	0	8141.05	0	8098.74	0	0
Aluminium smelting (relocating from any of the countries in the aluminium supply chain)
To:	Mozambique	Iceland	Norway	Tajikistan	Sweden	France	Brazil	Canada	Venezuela	New Zealand	Ghana	Slovakia	Cameroon	United States	Russia	Spain	Slovenia	Hungary	Argentina	Ukraine	Netherlands	Italy	Nigeria	Azerbaijan	Romania	Japan	Kazakhstan	Germany	Pakistan	Egypt	Ireland	United Kingdom	Turkey	Guinea	Guyana	Tanzania	Montenegro	Iran	Suriname	Dominican Republic	Bahrain	Poland	Malaysia	Sierra Leone	Indonesia	Greece	China	Jamaica	South Africa
Electricity grid emissions (kg CO2-eq / GJ)	0.110667	0.208056	1.455	8.50719	11.0942	22.9769	24.6817	50.1611	56.2648	59.3097	59.5377	60.3206	63.9594	67.264	90.4201	90.5217	91.3423	91.9006	101.666	107.254	108.911	110.684	112.057	115.684	115.735	121.237	121.911	122.55	125.311	127.712	135.057	135.264	137.577	143.261	143.261	143.261	149.796	161.572	169.191	174.017	180.761	181.511	182.199	186.354	201.705	203.116	206.931	217.963	231.93
From:
Mozambique	0	-132.644	-1830.98	-11436.1	-14959.5	-31143.9	-33465.7	-68168.7	-76482	-80629.1	-80939.6	-82005.9	-86962	-91462.8	-123002	-123140	-124257	-125018	-138319	-145929	-148186	-150601	-152471	-157411	-157480	-164974	-165892	-166763	-170523	-173793	-183797	-184078	-187230	-194971	-194971	-194971	-203872	-219911	-230287	-236860	-246046	-247067	-248004	-253663	-274571	-276493	-281689	-296715	-315738
Iceland	132.644	0	-1698.34	-11303.4	-14826.9	-31011.2	-33333.1	-68036.1	-76349.3	-80496.5	-80807	-81873.2	-86829.3	-91330.2	-122869	-123007	-124125	-124885	-138186	-145797	-148053	-150469	-152338	-157279	-157348	-164841	-165759	-166630	-170390	-173661	-183664	-183946	-187097	-194838	-194838	-194838	-203739	-219778	-230154	-236728	-245914	-246935	-247872	-253531	-274439	-276361	-281556	-296583	-315605
Norway	1830.98	1698.34	0	-9605.09	-13128.5	-29312.9	-31634.7	-66337.7	-74651	-78798.1	-79108.6	-80174.9	-85131	-89631.9	-121171	-121309	-122426	-123187	-136488	-144098	-146355	-148771	-150640	-155580	-155649	-163143	-164061	-164932	-168692	-171962	-181966	-182247	-185399	-193140	-193140	-193140	-202041	-218080	-228456	-235029	-244215	-245236	-246174	-251833	-272740	-274662	-279858	-294884	-313907
Tajikistan	11436.1	11303.4	9605.09	0	-3523.46	-19707.8	-22029.6	-56732.6	-65045.9	-69193	-69503.5	-70569.8	-75525.9	-80026.8	-111565	-111704	-112821	-113582	-126883	-134493	-136750	-139165	-141034	-145975	-146044	-153538	-154456	-155327	-159087	-162357	-172361	-172642	-175794	-183535	-183535	-183535	-192436	-208475	-218851	-225424	-234610	-235631	-236568	-242227	-263135	-265057	-270253	-285279	-304302
Sweden	14959.5	14826.9	13128.5	3523.46	0	-16184.3	-18506.2	-53209.2	-61522.4	-65669.6	-65980.1	-67046.3	-72002.4	-76503.3	-108042	-108180	-109298	-110058	-123360	-130970	-133226	-135642	-137511	-142452	-142521	-150014	-150932	-151803	-155563	-158834	-168837	-169119	-172270	-180011	-180011	-180011	-188912	-204951	-215327	-221901	-231087	-232108	-233045	-238704	-259612	-261534	-266729	-281756	-300778
France	31143.9	31011.2	29312.9	19707.8	16184.3	0	-2321.83	-37024.8	-45338.1	-49485.2	-49795.7	-50862	-55818.1	-60319	-91857.6	-91995.9	-93113.5	-93874	-107175	-114785	-117042	-119458	-121327	-126267	-126336	-133830	-134748	-135619	-139379	-142649	-152653	-152934	-156086	-163827	-163827	-163827	-172728	-188767	-199143	-205717	-214902	-215924	-216861	-222520	-243428	-245350	-250545	-265572	-284594
Brazil	33465.7	33333.1	31634.7	22029.6	18506.2	2321.83	0	-34703	-43016.3	-47163.4	-47473.9	-48540.2	-53496.3	-57997.1	-89535.8	-89674.1	-90791.7	-91552.1	-104853	-112464	-114720	-117136	-119005	-123946	-124014	-131508	-132426	-133297	-137057	-140328	-150331	-150613	-153764	-161505	-161505	-161505	-170406	-186445	-196821	-203395	-212581	-213602	-214539	-220198	-241106	-243028	-248223	-263250	-282272
Canada	68168.7	68036.1	66337.7	56732.6	53209.2	37024.8	34703	0	-8313.27	-12460.4	-12770.9	-13837.2	-18793.3	-23294.1	-54832.8	-54971.1	-56088.7	-56849.1	-70150.3	-77760.6	-80017.1	-82432.8	-84301.9	-89242.6	-89311.5	-96805.3	-97723.3	-98594	-102354	-105625	-115628	-115910	-119061	-126802	-126802	-126802	-135703	-151742	-162118	-168692	-177878	-178899	-179836	-185495	-206403	-208325	-213520	-228547	-247569
Venezuela	76482	76349.3	74651	65045.9	61522.4	45338.1	43016.3	8313.27	0	-4147.14	-4457.64	-5523.89	-10480	-14980.9	-46519.5	-46657.8	-47775.4	-48535.9	-61837.1	-69447.3	-71703.9	-74119.5	-75988.6	-80929.4	-80998.2	-88492	-89410	-90280.8	-94040.8	-97311.3	-107315	-107596	-110748	-118489	-118489	-118489	-127390	-143429	-153805	-160378	-169564	-170585	-171523	-177182	-198090	-200011	-205207	-220233	-239256
New Zealand	80629.1	80496.5	78798.1	69193	65669.6	49485.2	47163.4	12460.4	4147.14	0	-310.498	-1376.75	-6332.85	-10833.7	-42372.4	-42510.7	-43628.3	-44388.7	-57689.9	-65300.2	-67556.7	-69972.4	-71841.5	-76782.2	-76851.1	-84344.9	-85262.9	-86133.6	-89893.7	-93164.1	-103168	-103449	-106601	-114342	-114342	-114342	-123243	-139282	-149658	-156231	-165417	-166438	-167375	-173034	-193942	-195864	-201060	-216086	-235109
Ghana	80939.6	80807	79108.6	69503.5	65980.1	49795.7	47473.9	12770.9	4457.64	310.498	0	-1066.26	-6022.35	-10523.2	-42061.9	-42200.2	-43317.8	-44078.2	-57379.4	-64989.7	-67246.2	-69661.9	-71531	-76471.7	-76540.6	-84034.4	-84952.4	-85823.1	-89583.2	-92853.6	-102857	-103139	-106290	-114031	-114031	-114031	-122932	-138971	-149347	-155921	-165107	-166128	-167065	-172724	-193632	-195554	-200749	-215776	-234798
Slovakia	82005.9	81873.2	80174.9	70569.8	67046.3	50862	48540.2	13837.2	5523.89	1376.75	1066.26	0	-4956.09	-9456.97	-40995.6	-41133.9	-42251.5	-43012	-56313.2	-63923.4	-66180	-68595.6	-70464.7	-75405.5	-75474.3	-82968.1	-83886.1	-84756.9	-88516.9	-91787.4	-101791	-102072	-105224	-112965	-112965	-112965	-121866	-137905	-148281	-154855	-164040	-165062	-165999	-171658	-192566	-194488	-199683	-214710	-233732
Cameroon	86962	86829.3	85131	75525.9	72002.4	55818.1	53496.3	18793.3	10480	6332.85	6022.35	4956.09	0	-4500.88	-36039.5	-36177.8	-37295.5	-38055.9	-51357.1	-58967.3	-61223.9	-63639.5	-65508.6	-70449.4	-70518.2	-78012	-78930	-79800.8	-83560.8	-86831.3	-96834.9	-97116.4	-100268	-108009	-108009	-108009	-116910	-132949	-143325	-149898	-159084	-160105	-161043	-166702	-187610	-189531	-194727	-209753	-228776
United States	91462.8	91330.2	89631.9	80026.8	76503.3	60319	57997.1	23294.1	14980.9	10833.7	10523.2	9456.97	4500.88	0	-31538.7	-31676.9	-32794.6	-33555	-46856.2	-54466.5	-56723	-59138.6	-61007.7	-65948.5	-66017.4	-73511.2	-74429.1	-75299.9	-79059.9	-82330.4	-92334	-92615.5	-95767	-103508	-103508	-103508	-112409	-128448	-138824	-145398	-154583	-155605	-156542	-162201	-183109	-185031	-190226	-205253	-224275
Russia	123002	122869	121171	111565	108042	91857.6	89535.8	54832.8	46519.5	42372.4	42061.9	40995.6	36039.5	31538.7	0	-138.281	-1255.92	-2016.33	-15317.5	-22927.8	-25184.3	-27600	-29469.1	-34409.8	-34478.7	-41972.5	-42890.5	-43761.2	-47521.3	-50791.7	-60795.3	-61076.8	-64228.3	-71969.3	-71969.3	-71969.3	-80870.5	-96909.5	-107285	-113859	-123045	-124066	-125003	-130662	-151570	-153492	-158687	-173714	-192736
Spain	123140	123007	121309	111704	108180	91995.9	89674.1	54971.1	46657.8	42510.7	42200.2	41133.9	36177.8	31676.9	138.281	0	-1117.63	-1878.05	-15179.3	-22789.5	-25046	-27461.7	-29330.8	-34271.6	-34340.4	-41834.2	-42752.2	-43623	-47383	-50653.5	-60657	-60938.5	-64090	-71831	-71831	-71831	-80732.2	-96771.2	-107147	-113721	-122907	-123928	-124865	-130524	-151432	-153354	-158549	-173576	-192598
Slovenia	124257	124125	122426	112821	109298	93113.5	90791.7	56088.7	47775.4	43628.3	43317.8	42251.5	37295.5	32794.6	1255.92	1117.63	0	-760.412	-14061.6	-21671.9	-23928.4	-26344.1	-28213.1	-33153.9	-33222.8	-40716.6	-41634.6	-42505.3	-46265.4	-49535.8	-59539.4	-59820.9	-62972.4	-70713.4	-70713.4	-70713.4	-79614.6	-95653.6	-106029	-112603	-121789	-122810	-123747	-129406	-150314	-152236	-157431	-172458	-191481
Hungary	125018	124885	123187	113582	110058	93874	91552.1	56849.1	48535.9	44388.7	44078.2	43012	38055.9	33555	2016.33	1878.05	760.412	0	-13301.2	-20911.5	-23168	-25583.7	-27452.7	-32393.5	-32462.4	-39956.2	-40874.1	-41744.9	-45504.9	-48775.4	-58779	-59060.5	-62212	-69953	-69953	-69953	-78854.2	-94893.2	-105269	-111843	-121028	-122050	-122987	-128646	-149554	-151476	-156671	-171698	-190720
Argentina	138319	138186	136488	126883	123360	107175	104853	70150.3	61837.1	57689.9	57379.4	56313.2	51357.1	46856.2	15317.5	15179.3	14061.6	13301.2	0	-7610.25	-9866.78	-12282.4	-14151.5	-19092.3	-19161.1	-26654.9	-27572.9	-28443.7	-32203.7	-35474.2	-45477.8	-45759.3	-48910.8	-56651.7	-56651.7	-56651.7	-65552.9	-81591.9	-91967.8	-98541.3	-107727	-108748	-109685	-115344	-136252	-138174	-143370	-158396	-177419
Ukraine	145929	145797	144098	134493	130970	114785	112464	77760.6	69447.3	65300.2	64989.7	63923.4	58967.3	54466.5	22927.8	22789.5	21671.9	20911.5	7610.25	0	-2256.53	-4672.19	-6541.27	-11482	-11550.9	-19044.7	-19962.7	-20833.5	-24593.5	-27863.9	-37867.5	-38149	-41300.5	-49041.5	-49041.5	-49041.5	-57942.7	-73981.7	-84357.6	-90931.1	-100117	-101138	-102075	-107734	-128642	-130564	-135760	-150786	-169809
Netherlands	148186	148053	146355	136750	133226	117042	114720	80017.1	71703.9	67556.7	67246.2	66180	61223.9	56723	25184.3	25046	23928.4	23168	9866.78	2256.53	0	-2415.66	-4284.74	-9225.51	-9294.36	-16788.2	-17706.2	-18576.9	-22337	-25607.4	-35611	-35892.5	-39044	-46785	-46785	-46785	-55686.2	-71725.2	-82101.1	-88674.6	-97860.5	-98881.6	-99818.7	-105478	-126386	-128308	-133503	-148530	-167552
Italy	150601	150469	148771	139165	135642	119458	117136	82432.8	74119.5	69972.4	69661.9	68595.6	63639.5	59138.6	27600	27461.7	26344.1	25583.7	12282.4	4672.19	2415.66	0	-1869.08	-6809.85	-6878.71	-14372.5	-15290.5	-16161.3	-19921.3	-23191.8	-33195.3	-33476.8	-36628.3	-44369.3	-44369.3	-44369.3	-53270.5	-69309.5	-79685.4	-86258.9	-95444.8	-96465.9	-97403	-103062	-123970	-125892	-131087	-146114	-165136
Nigeria	152471	152338	150640	141034	137511	121327	119005	84301.9	75988.6	71841.5	71531	70464.7	65508.6	61007.7	29469.1	29330.8	28213.1	27452.7	14151.5	6541.27	4284.74	1869.08	0	-4940.77	-5009.63	-12503.4	-13421.4	-14292.2	-18052.2	-21322.7	-31326.3	-31607.7	-34759.3	-42500.2	-42500.2	-42500.2	-51401.4	-67440.4	-77816.3	-84389.8	-93575.8	-94596.8	-95533.9	-101193	-122101	-124023	-129218	-144245	-163267
Azerbaijan	157411	157279	155580	145975	142452	126267	123946	89242.6	80929.4	76782.2	76471.7	75405.5	70449.4	65948.5	34409.8	34271.6	33153.9	32393.5	19092.3	11482	9225.51	6809.85	4940.77	0	-68.8567	-7562.66	-8480.64	-9351.42	-13111.4	-16381.9	-26385.5	-26667	-29818.5	-37559.5	-37559.5	-37559.5	-46460.7	-62499.6	-72875.6	-79449.1	-88635	-89656.1	-90593.2	-96252.2	-117160	-119082	-124278	-139304	-158327
Romania	157480	157348	155649	146044	142521	126336	124014	89311.5	80998.2	76851.1	76540.6	75474.3	70518.2	66017.4	34478.7	34340.4	33222.8	32462.4	19161.1	11550.9	9294.36	6878.71	5009.63	68.8567	0	-7493.8	-8411.79	-9282.56	-13042.6	-16313.1	-26316.6	-26598.1	-29749.6	-37490.6	-37490.6	-37490.6	-46391.8	-62430.8	-72806.7	-79380.2	-88566.1	-89587.2	-90524.3	-96183.3	-117091	-119013	-124209	-139235	-158258
Japan	164974	164841	163143	153538	150014	133830	131508	96805.3	88492	84344.9	84034.4	82968.1	78012	73511.2	41972.5	41834.2	40716.6	39956.2	26654.9	19044.7	16788.2	14372.5	12503.4	7562.66	7493.8	0	-917.988	-1788.76	-5548.79	-8819.25	-18822.8	-19104.3	-22255.8	-29996.8	-29996.8	-29996.8	-38898	-54937	-65312.9	-71886.4	-81072.3	-82093.4	-83030.5	-88689.5	-109597	-111519	-116715	-131741	-150764
Kazakhstan	165892	165759	164061	154456	150932	134748	132426	97723.3	89410	85262.9	84952.4	83886.1	78930	74429.1	42890.5	42752.2	41634.6	40874.1	27572.9	19962.7	17706.2	15290.5	13421.4	8480.64	8411.79	917.988	0	-870.772	-4630.8	-7901.26	-17904.9	-18186.3	-21337.8	-29078.8	-29078.8	-29078.8	-37980	-54019	-64394.9	-70968.4	-80154.3	-81175.4	-82112.5	-87771.5	-108680	-110601	-115797	-130823	-149846
Germany	166763	166630	164932	155327	151803	135619	133297	98594	90280.8	86133.6	85823.1	84756.9	79800.8	75299.9	43761.2	43623	42505.3	41744.9	28443.7	20833.5	18576.9	16161.3	14292.2	9351.42	9282.56	1788.76	870.772	0	-3760.03	-7030.49	-17034.1	-17315.6	-20467.1	-28208	-28208	-28208	-37109.2	-53148.2	-63524.1	-70097.6	-79283.6	-80304.7	-81241.7	-86900.7	-107809	-109731	-114926	-129953	-148975
Pakistan	170523	170390	168692	159087	155563	139379	137057	102354	94040.8	89893.7	89583.2	88516.9	83560.8	79059.9	47521.3	47383	46265.4	45504.9	32203.7	24593.5	22337	19921.3	18052.2	13111.4	13042.6	5548.79	4630.8	3760.03	0	-3270.46	-13274.1	-13555.5	-16707	-24448	-24448	-24448	-33349.2	-49388.2	-59764.1	-66337.6	-75523.5	-76544.6	-77481.7	-83140.7	-104049	-105971	-111166	-126193	-145215
Egypt	173793	173661	171962	162357	158834	142649	140328	105625	97311.3	93164.1	92853.6	91787.4	86831.3	82330.4	50791.7	50653.5	49535.8	48775.4	35474.2	27863.9	25607.4	23191.8	21322.7	16381.9	16313.1	8819.25	7901.26	7030.49	3270.46	0	-10003.6	-10285.1	-13436.6	-21177.5	-21177.5	-21177.5	-30078.7	-46117.7	-56493.6	-63067.1	-72253.1	-73274.2	-74211.3	-79870.3	-100778	-102700	-107896	-122922	-141945
Ireland	183797	183664	181966	172361	168837	152653	150331	115628	107315	103168	102857	101791	96834.9	92334	60795.3	60657	59539.4	58779	45477.8	37867.5	35611	33195.3	31326.3	26385.5	26316.6	18822.8	17904.9	17034.1	13274.1	10003.6	0	-281.48	-3433	-11174	-11174	-11174	-20075.2	-36114.1	-46490.1	-53063.6	-62249.5	-63270.6	-64207.7	-69866.7	-90774.7	-92696.6	-97892	-112919	-131941
United Kingdom	184078	183946	182247	172642	169119	152934	150613	115910	107596	103449	103139	102072	97116.4	92615.5	61076.8	60938.5	59820.9	59060.5	45759.3	38149	35892.5	33476.8	31607.7	26667	26598.1	19104.3	18186.3	17315.6	13555.5	10285.1	281.48	0	-3151.52	-10892.5	-10892.5	-10892.5	-19793.7	-35832.7	-46208.6	-52782.1	-61968	-62989.1	-63926.2	-69585.2	-90493.2	-92415.1	-97610.5	-112637	-131660
Turkey	187230	187097	185399	175794	172270	156086	153764	119061	110748	106601	106290	105224	100268	95767	64228.3	64090	62972.4	62212	48910.8	41300.5	39044	36628.3	34759.3	29818.5	29749.6	22255.8	21337.8	20467.1	16707	13436.6	3433	3151.52	0	-7740.96	-7740.96	-7740.96	-16642.2	-32681.2	-43057.1	-49630.6	-58816.5	-59837.6	-60774.7	-66433.7	-87341.7	-89263.6	-94459	-109486	-128508
Guinea	194971	194838	193140	183535	180011	163827	161505	126802	118489	114342	114031	112965	108009	103508	71969.3	71831	70713.4	69953	56651.7	49041.5	46785	44369.3	42500.2	37559.5	37490.6	29996.8	29078.8	28208	24448	21177.5	11174	10892.5	7740.96	0	0	0	-8901.2	-24940.2	-35316.1	-41889.6	-51075.5	-52096.6	-53033.7	-58692.7	-79600.7	-81522.6	-86718.1	-101745	-120767
Guyana	194971	194838	193140	183535	180011	163827	161505	126802	118489	114342	114031	112965	108009	103508	71969.3	71831	70713.4	69953	56651.7	49041.5	46785	44369.3	42500.2	37559.5	37490.6	29996.8	29078.8	28208	24448	21177.5	11174	10892.5	7740.96	0	0	0	-8901.2	-24940.2	-35316.1	-41889.6	-51075.5	-52096.6	-53033.7	-58692.7	-79600.7	-81522.6	-86718.1	-101745	-120767
Tanzania	194971	194838	193140	183535	180011	163827	161505	126802	118489	114342	114031	112965	108009	103508	71969.3	71831	70713.4	69953	56651.7	49041.5	46785	44369.3	42500.2	37559.5	37490.6	29996.8	29078.8	28208	24448	21177.5	11174	10892.5	7740.96	0	0	0	-8901.2	-24940.2	-35316.1	-41889.6	-51075.5	-52096.6	-53033.7	-58692.7	-79600.7	-81522.6	-86718.1	-101745	-120767
Montenegro	203872	203739	202041	192436	188912	172728	170406	135703	127390	123243	122932	121866	116910	112409	80870.5	80732.2	79614.6	78854.2	65552.9	57942.7	55686.2	53270.5	51401.4	46460.7	46391.8	38898	37980	37109.2	33349.2	30078.7	20075.2	19793.7	16642.2	8901.2	8901.2	8901.2	0	-16039	-26414.9	-32988.4	-42174.3	-43195.4	-44132.5	-49791.5	-70699.5	-72621.4	-77816.8	-92843.4	-111866
Iran	219911	219778	218080	208475	204951	188767	186445	151742	143429	139282	138971	137905	132949	128448	96909.5	96771.2	95653.6	94893.2	81591.9	73981.7	71725.2	69309.5	67440.4	62499.6	62430.8	54937	54019	53148.2	49388.2	46117.7	36114.1	35832.7	32681.2	24940.2	24940.2	24940.2	16039	0	-10375.9	-16949.4	-26135.3	-27156.4	-28093.5	-33752.5	-54660.5	-56582.4	-61777.9	-76804.4	-95827
Suriname	230287	230154	228456	218851	215327	199143	196821	162118	153805	149658	149347	148281	143325	138824	107285	107147	106029	105269	91967.8	84357.6	82101.1	79685.4	77816.3	72875.6	72806.7	65312.9	64394.9	63524.1	59764.1	56493.6	46490.1	46208.6	43057.1	35316.1	35316.1	35316.1	26414.9	10375.9	0	-6573.5	-15759.4	-16780.5	-17717.6	-23376.6	-44284.6	-46206.5	-51402	-66428.5	-85451.1
Dominican Republic	236860	236728	235029	225424	221901	205717	203395	168692	160378	156231	155921	154855	149898	145398	113859	113721	112603	111843	98541.3	90931.1	88674.6	86258.9	84389.8	79449.1	79380.2	71886.4	70968.4	70097.6	66337.6	63067.1	53063.6	52782.1	49630.6	41889.6	41889.6	41889.6	32988.4	16949.4	6573.5	0	-9185.93	-10207	-11144.1	-16803.1	-37711.1	-39633	-44828.5	-59855	-78877.6
Bahrain	246046	245914	244215	234610	231087	214902	212581	177878	169564	165417	165107	164040	159084	154583	123045	122907	121789	121028	107727	100117	97860.5	95444.8	93575.8	88635	88566.1	81072.3	80154.3	79283.6	75523.5	72253.1	62249.5	61968	58816.5	51075.5	51075.5	51075.5	42174.3	26135.3	15759.4	9185.93	0	-1021.08	-1958.18	-7617.17	-28525.2	-30447.1	-35642.5	-50669.1	-69691.6
Poland	247067	246935	245236	235631	232108	215924	213602	178899	170585	166438	166128	165062	160105	155605	124066	123928	122810	122050	108748	101138	98881.6	96465.9	94596.8	89656.1	89587.2	82093.4	81175.4	80304.7	76544.6	73274.2	63270.6	62989.1	59837.6	52096.6	52096.6	52096.6	43195.4	27156.4	16780.5	10207	1021.08	0	-937.094	-6596.09	-27504.1	-29426	-34621.4	-49648	-68670.6
Malaysia	248004	247872	246174	236568	233045	216861	214539	179836	171523	167375	167065	165999	161043	156542	125003	124865	123747	122987	109685	102075	99818.7	97403	95533.9	90593.2	90524.3	83030.5	82112.5	81241.7	77481.7	74211.3	64207.7	63926.2	60774.7	53033.7	53033.7	53033.7	44132.5	28093.5	17717.6	11144.1	1958.18	937.094	0	-5659	-26567	-28488.9	-33684.3	-48710.9	-67733.5
Sierra Leone	253663	253531	251833	242227	238704	222520	220198	185495	177182	173034	172724	171658	166702	162201	130662	130524	129406	128646	115344	107734	105478	103062	101193	96252.2	96183.3	88689.5	87771.5	86900.7	83140.7	79870.3	69866.7	69585.2	66433.7	58692.7	58692.7	58692.7	49791.5	33752.5	23376.6	16803.1	7617.17	6596.09	5659	0	-20908	-22829.9	-28025.3	-43051.9	-62074.5
Indonesia	274571	274439	272740	263135	259612	243428	241106	206403	198090	193942	193632	192566	187610	183109	151570	151432	150314	149554	136252	128642	126386	123970	122101	117160	117091	109597	108680	107809	104049	100778	90774.7	90493.2	87341.7	79600.7	79600.7	79600.7	70699.5	54660.5	44284.6	37711.1	28525.2	27504.1	26567	20908	0	-1921.93	-7117.36	-22143.9	-41166.5
Greece	276493	276361	274662	265057	261534	245350	243028	208325	200011	195864	195554	194488	189531	185031	153492	153354	152236	151476	138174	130564	128308	125892	124023	119082	119013	111519	110601	109731	105971	102700	92696.6	92415.1	89263.6	81522.6	81522.6	81522.6	72621.4	56582.4	46206.5	39633	30447.1	29426	28488.9	22829.9	1921.93	0	-5195.42	-20222	-39244.6
China	281689	281556	279858	270253	266729	250545	248223	213520	205207	201060	200749	199683	194727	190226	158687	158549	157431	156671	143370	135760	133503	131087	129218	124278	124209	116715	115797	114926	111166	107896	97892	97610.5	94459	86718.1	86718.1	86718.1	77816.8	61777.9	51402	44828.5	35642.5	34621.4	33684.3	28025.3	7117.36	5195.42	0	-15026.6	-34049.1
Jamaica	296715	296583	294884	285279	281756	265572	263250	228547	220233	216086	215776	214710	209753	205253	173714	173576	172458	171698	158396	150786	148530	146114	144245	139304	139235	131741	130823	129953	126193	122922	112919	112637	109486	101745	101745	101745	92843.4	76804.4	66428.5	59855	50669.1	49648	48710.9	43051.9	22143.9	20222	15026.6	0	-19022.6
South Africa	315738	315605	313907	304302	300778	284594	282272	247569	239256	235109	234798	233732	228776	224275	192736	192598	191481	190720	177419	169809	167552	165136	163267	158327	158258	150764	149846	148975	145215	141945	131941	131660	128508	120767	120767	120767	111866	95827	85451.1	78877.6	69691.6	68670.6	67733.5	62074.5	41166.5	39244.6	34049.1	19022.6	0
United Arab Emirates	318427	318294	316596	306991	303467	287283	284961	250258	241945	237798	237487	236421	231465	226964	195426	195287	194170	193409	180108	172498	170241	167826	165956	161016	160947	153453	152535	151664	147904	144634	134630	134349	131197	123456	123456	123456	114555	98516	88140.1	81566.6	72380.7	71359.6	70422.5	64763.5	43855.5	41933.6	36738.2	21711.6	2689.04
Oman	324343	324211	322512	312907	309384	293199	290877	256174	247861	243714	243404	242337	237381	232880	201342	201203	200086	199325	186024	178414	176157	173742	171873	166932	166863	159369	158451	157580	153820	150550	140546	140265	137113	129372	129372	129372	120471	104432	94056.3	87482.8	78296.8	77275.8	76338.7	70679.7	49771.7	47849.7	42654.3	27627.8	8605.19
Australia	334033	333901	332202	322597	319074	302890	300568	265865	257551	253404	253094	252028	247071	242571	211032	210894	209776	209016	195714	188104	185848	183432	181563	176622	176553	169059	168141	167271	163511	160240	150237	149955	146804	139063	139063	139063	130161	114122	103746	97173	87987.1	86966	86028.9	80369.9	59461.9	57540	52344.5	37318	18295.4
Bosnia and Herzegovina	351053	350921	349222	339617	336094	319909	317588	282885	274571	270424	270114	269047	264091	259590	228052	227913	226796	226035	212734	205124	202867	200452	198583	193642	193573	186079	185161	184290	180530	177260	167256	166975	163823	156082	156082	156082	147181	131142	120766	114193	105007	103986	103049	97389.7	76481.7	74559.8	69364.4	54337.8	35315.3
India	366162	366029	364331	354726	351202	335018	332696	297993	289680	285533	285222	284156	279200	274699	243160	243022	241904	241144	227843	220232	217976	215560	213691	208750	208681	201188	200270	199399	195639	192368	182365	182083	178932	171191	171191	171191	162290	146251	135875	129301	120115	119094	118157	112498	91590.1	89668.2	84472.8	69446.2	50423.7
[truncated: 5 more columns]
